# Supplementary material for: Spatial-Temporal Cellular Bioeffects from Acoustic Droplet Vaporization
Source: PubMed Central journal article supplement — Theranostics. 2018 Nov 10;8(20):5731–43. doi: 10.7150/thno.28782 (PMC6276289; doi:10.7150/thno.28782), 2018-11-10
Supplement: thnov08p5731s1.pdf [file thnov08p5731s1.pdf]

1  
2  
3  
4  
5  
6  
7  
8  
9  
10  
11  
12  
13  
14  
15  
16  
17  
18

## SUPPLEMENTARY MATERIALS

Ching-Hsiang Fan, Yi-Ting Lin, Yi-Ju Ho, Chih-Kuang Yeh\*

Department of Biomedical Engineering and Environmental Sciences, National Tsing

Hua University, Hsinchu, Taiwan

\* Corresponding author at: Department of Biomedical Engineering and Environmental  
Sciences, National Tsing Hua University, No. 101, Section 2, Kuang-Fu Road,  
Hsinchu, Taiwan 30013, R.O.C. Tel: +886-3-571-5131, ext. 34234; Fax:  
+886-3-571-8649 (C.-K. Yeh).

E-mail address: ckyeh@mx.nthu.edu.tw (C.-K. Yeh)

### **Table of Contents**

#### **Method**

Characteristics of droplet-generated vesicles

#### **Figure**

Figure S1. The property of DiI-droplet.

1 Figure S2. The property of DiI-droplet released vesicles

2 Figure S3. The initial scatter plot of different cellular responses.

3

#### 4 **VIDEOS**

5 Movie S1. 3D images of the interaction between cell and ADV-bubble after droplet  
6 vaporization.

7 Movie S2. Side-view images of droplet vaporization acquired by high-speed  
8 fluorescence microscopic imaging.

9 Movie S3. Time-lapse microscopic images demonstrated that the ADV-bubble induces  
10 substance leakage from cytoplasm after ADV-bubbles attaching to the cells.

11 Movie S4. Time-lapse microscopic images demonstrated that the ADV-bubble torn off  
12 cellular membrane after ADV-bubbles attaching to the cells.

13

#### 14 **Method**

##### 15 **Characteristics of droplet-generated vesicles**

16 In order to measure the size of droplets-generated vesicles, the droplets were  
17 firstly vaporized by ultrasound, and the suspensions were collected and analyzed by a  
18 dynamic light-scattering system (DLS, Nanosizer-S, Malvern, London, UK) and a  
19 transmission electron microscope (TEM, Hitachi H-7100, Tokyo, Japan).

20

1 **Figure**

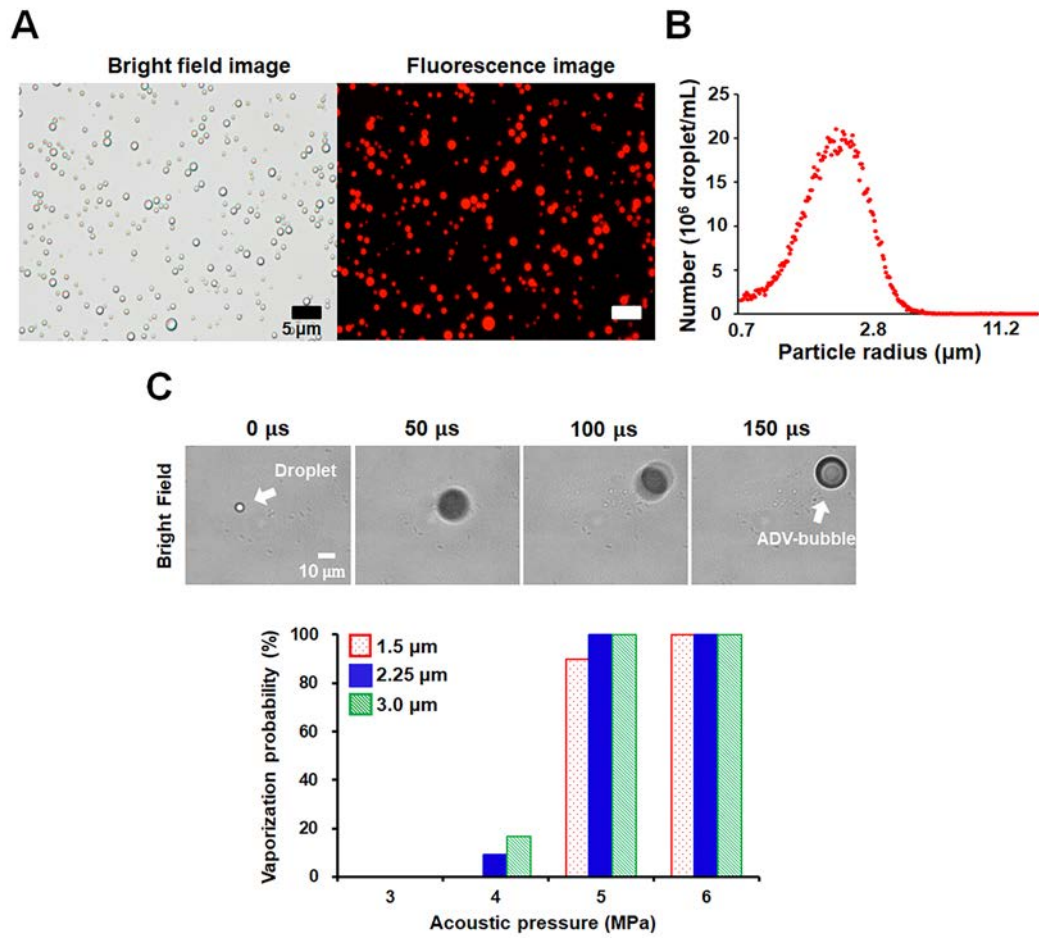

2

3 **Supplemental Figure S1.** (A) Bright field and fluorescence microscopic images of  
4 DiI-droplet. (B) The size distribution of DiI-droplet measured by a coulter counter  
5 (Multisizer 3, Beckman Coulter, Miami FL, USA). (C) The acoustic vaporization  
6 threshold of DiI-droplet with different size.

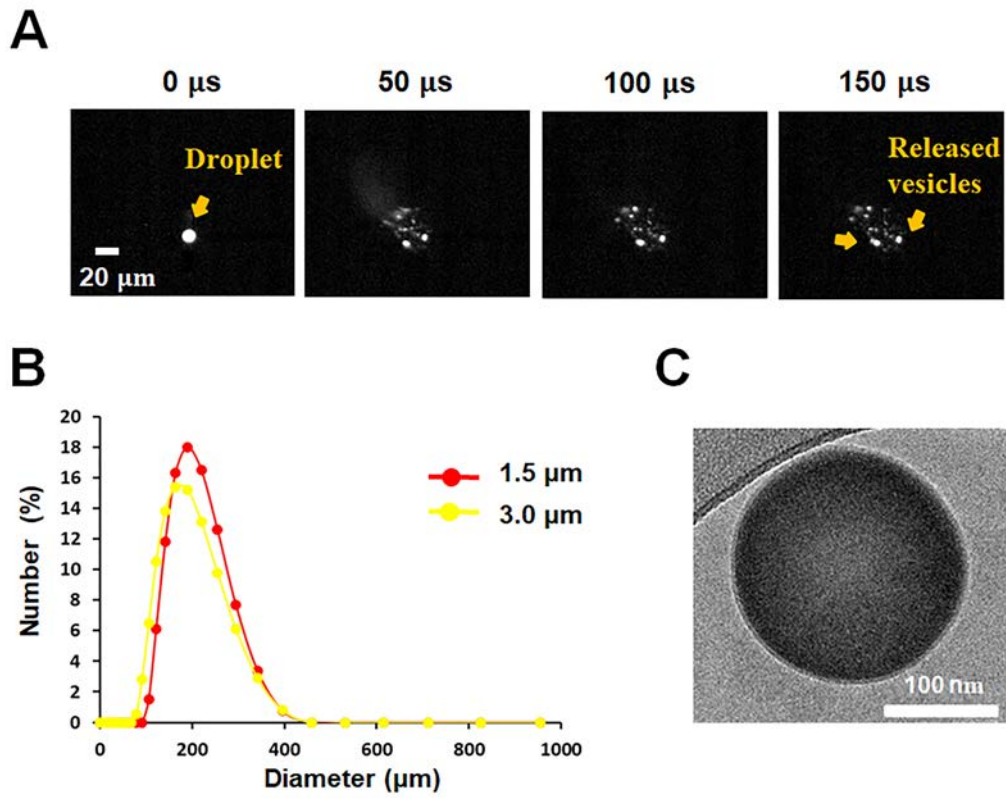

1

2 **Supplemental Figure S2.** (A) The process of vesicles generated from DiI-droplet  
 3 with ultrasound sonication acquired by high-speed fluorescence microscopic system.

4 (B) The size distribution of DiI-droplet measured by DLS. (C) The structure of  
 5 DiI-droplet released vesicle imaged by TEM.

6

7

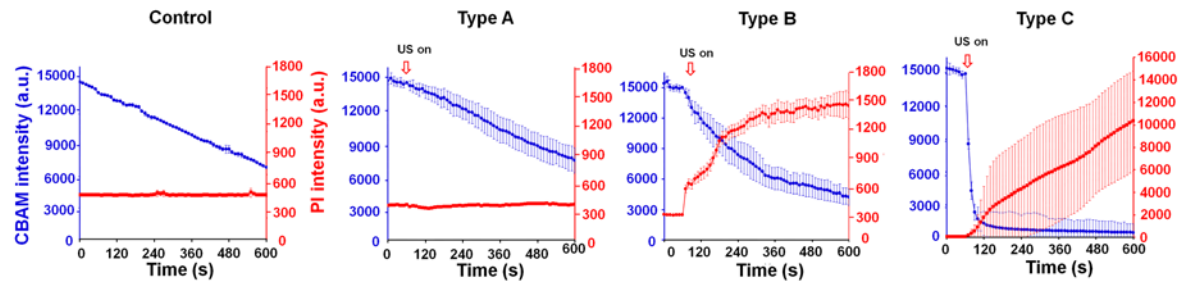

1

2 **Supplemental Figure S3.** The initial scatter plot of different cellular responses.
